# Supplementary material
Source: bioRxiv or medRxiv preprint supplement (https://medrxiv.org/highwire/filestream/91270/field_highwire_adjunct_files/0/2020.07.27.20161836-1.pdf)
Supplement: Supplementary file [file 2020.07.27.20161836-1.pdf]

A.

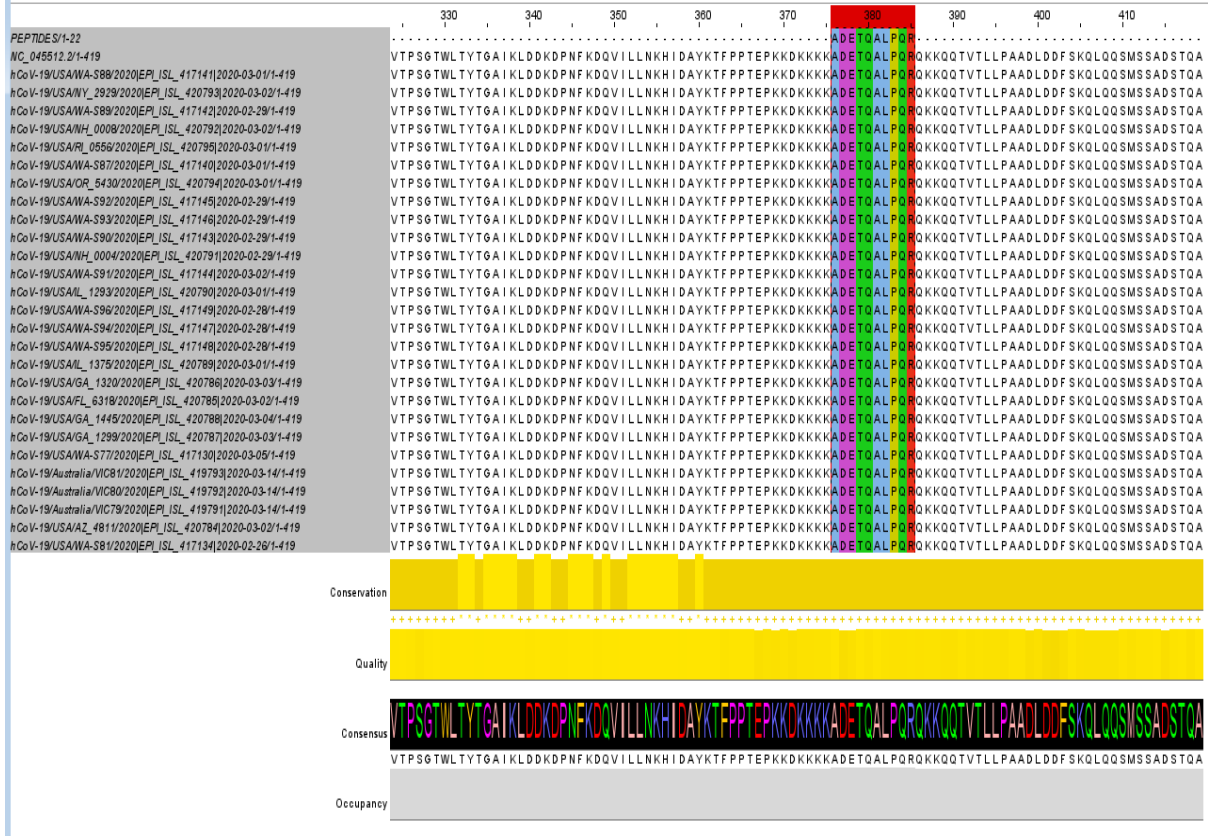

B.

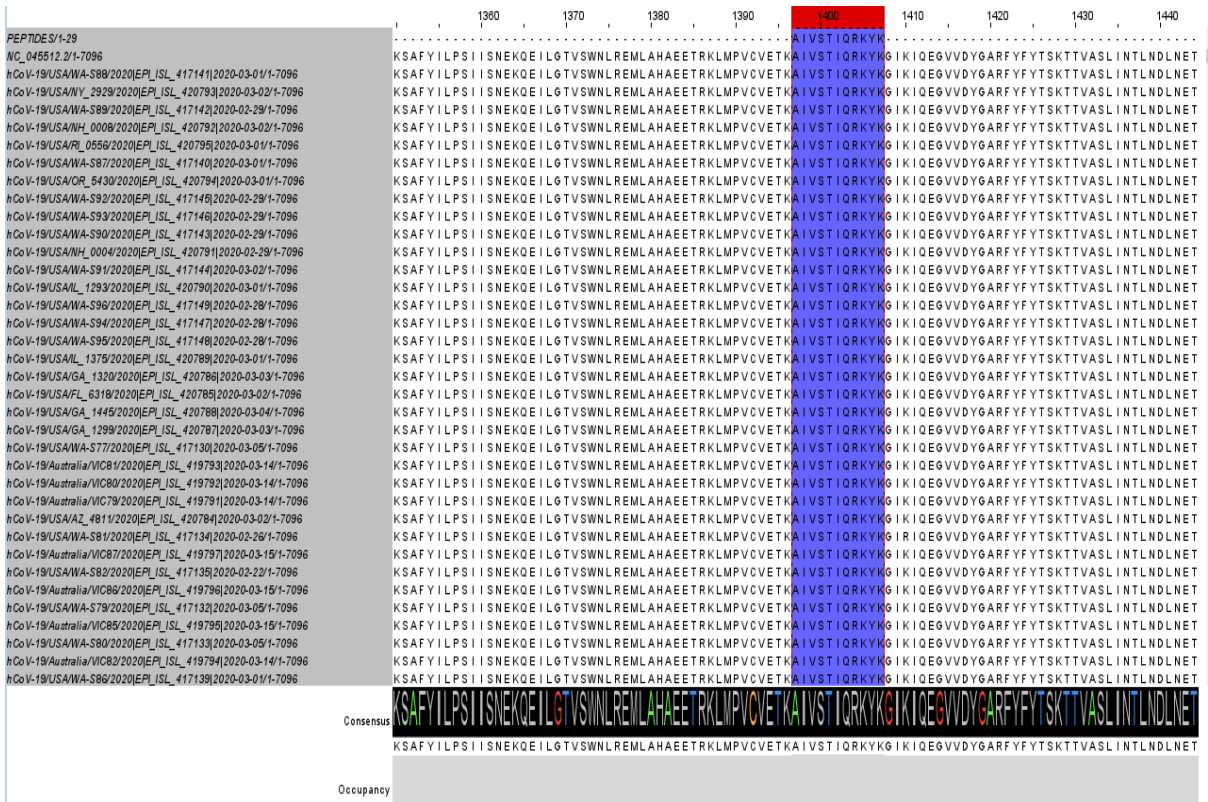

C.

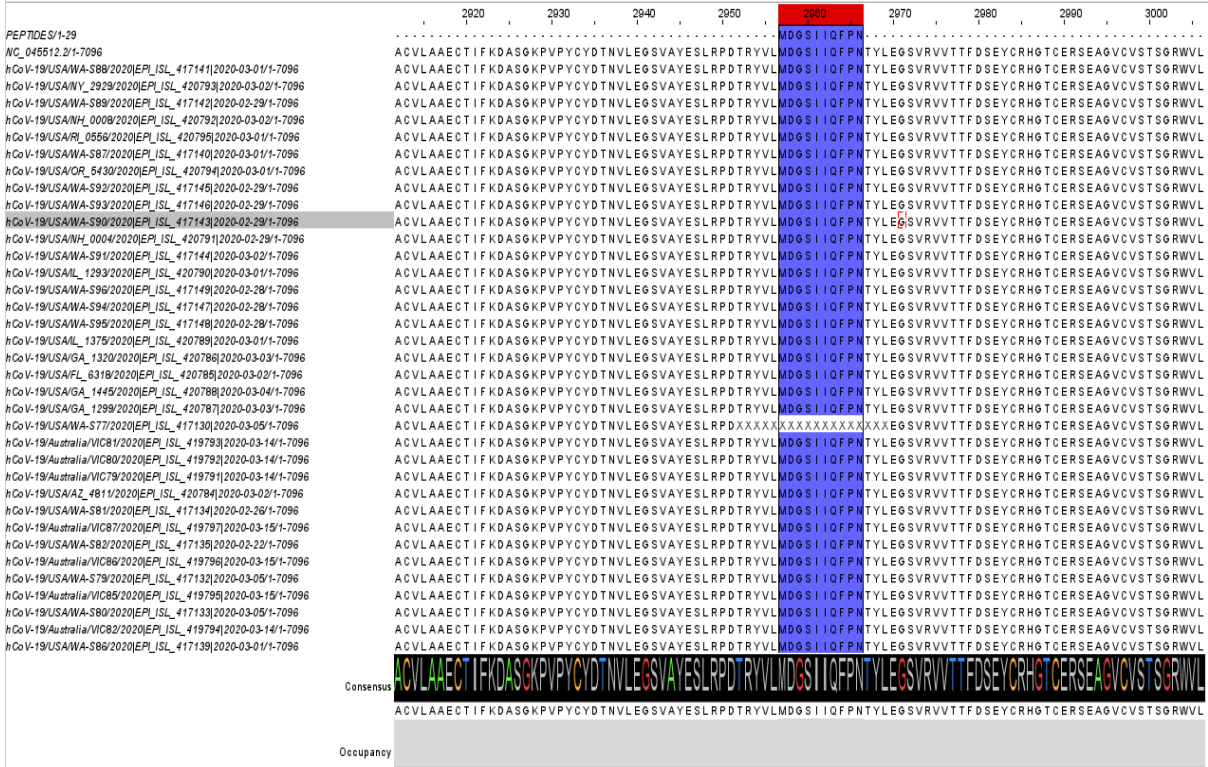

D.

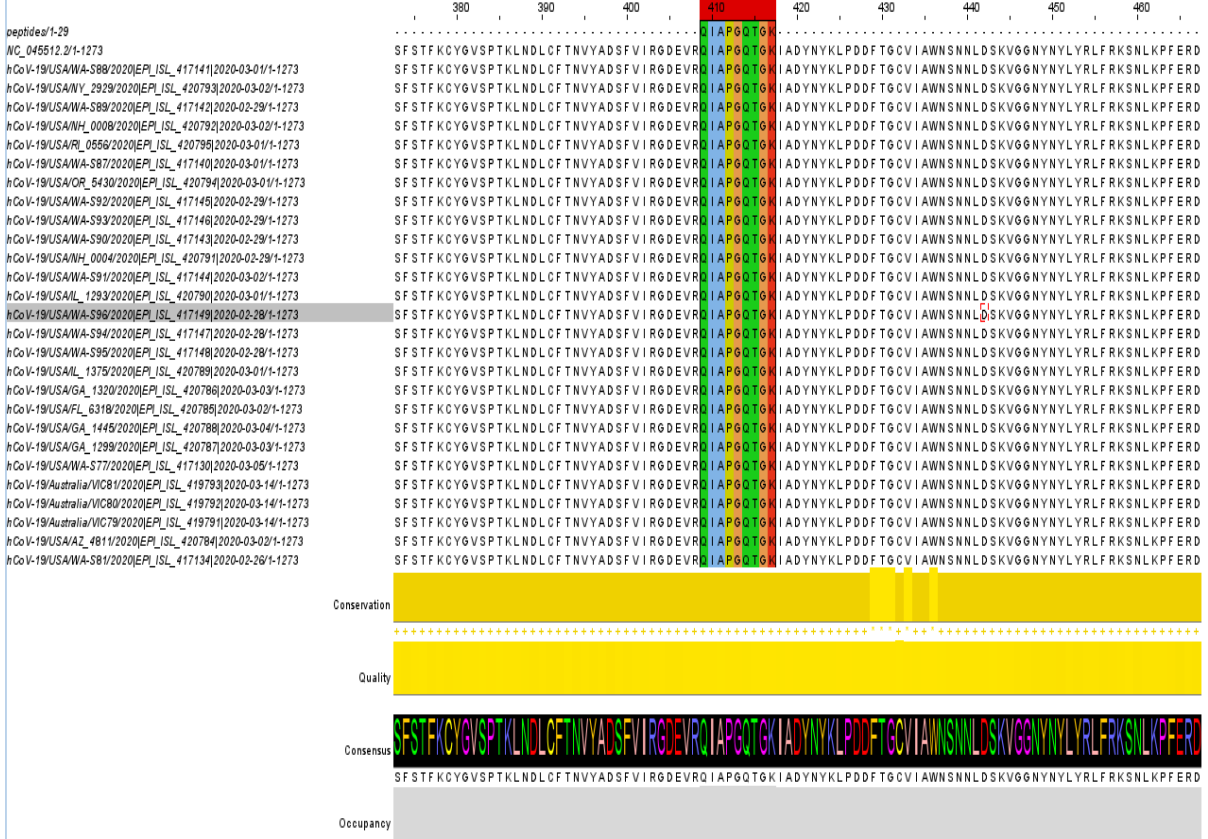

E.

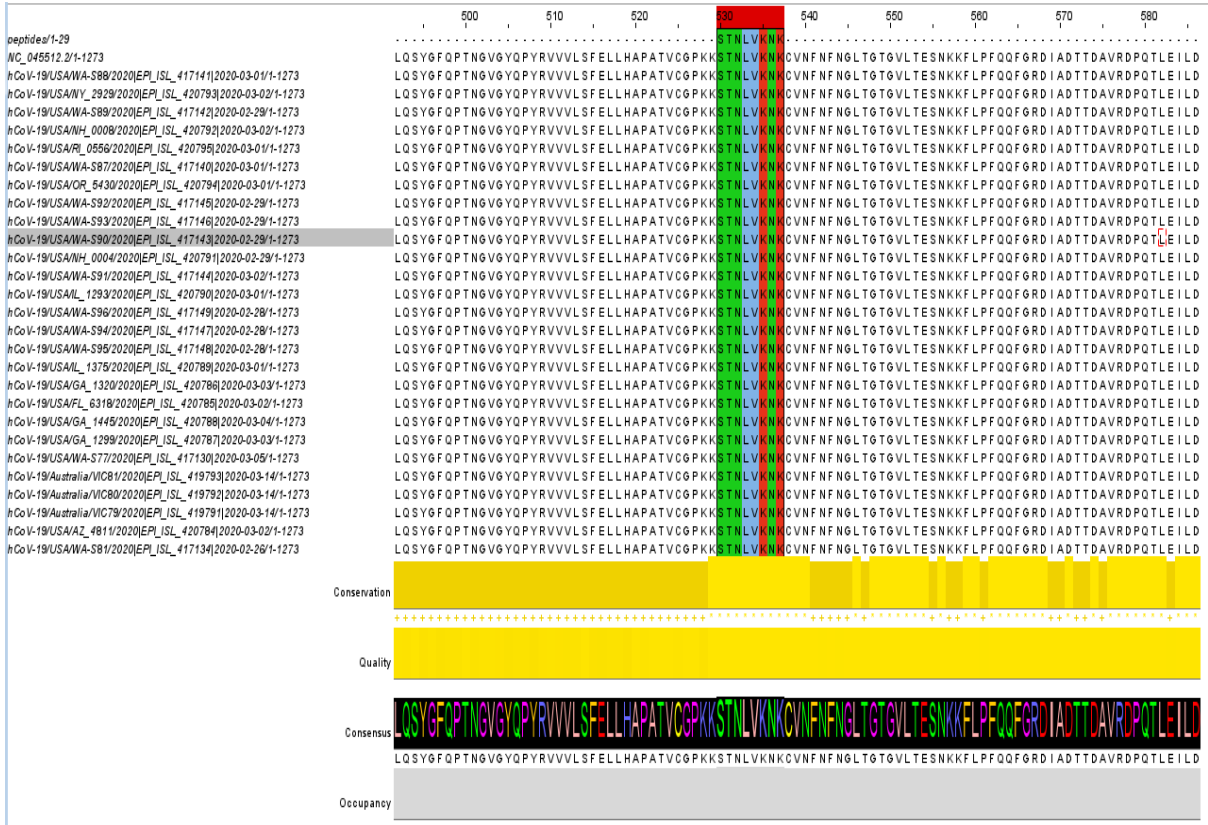

F.

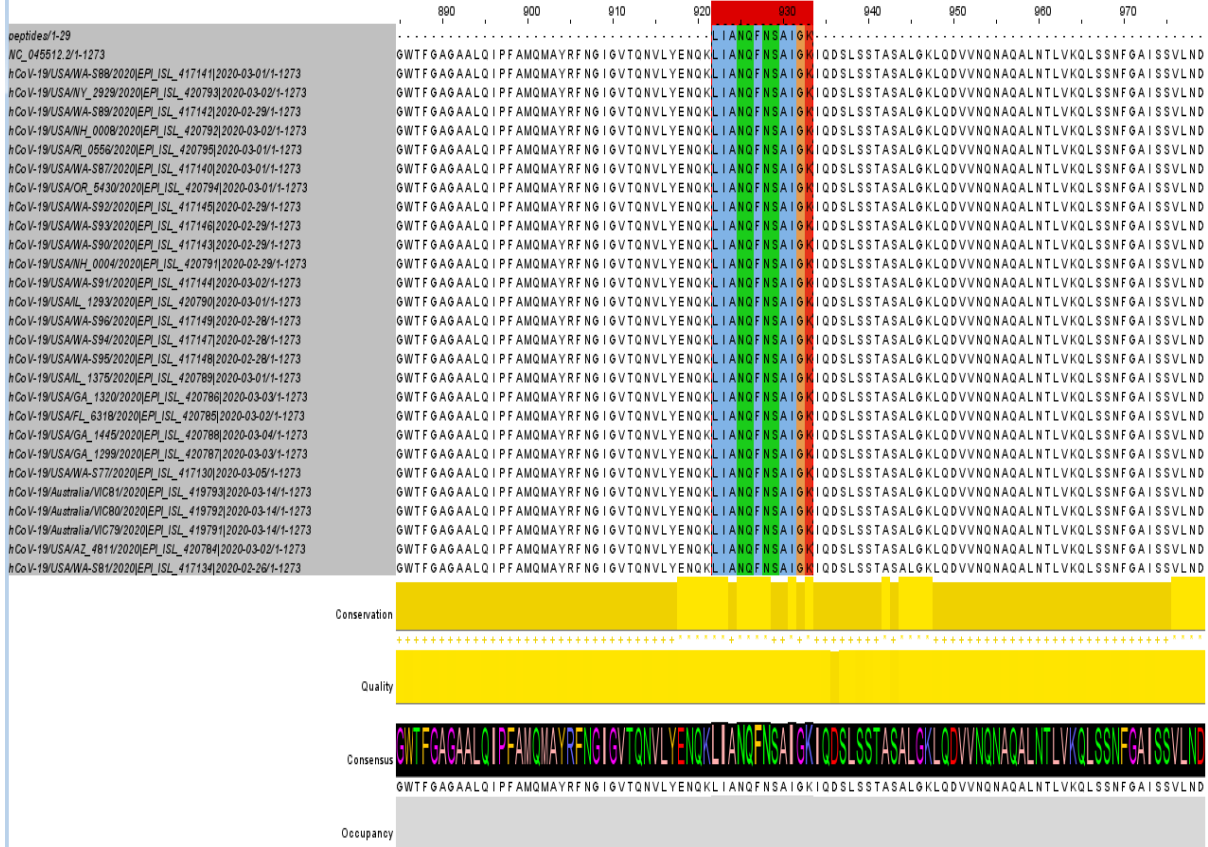

G.

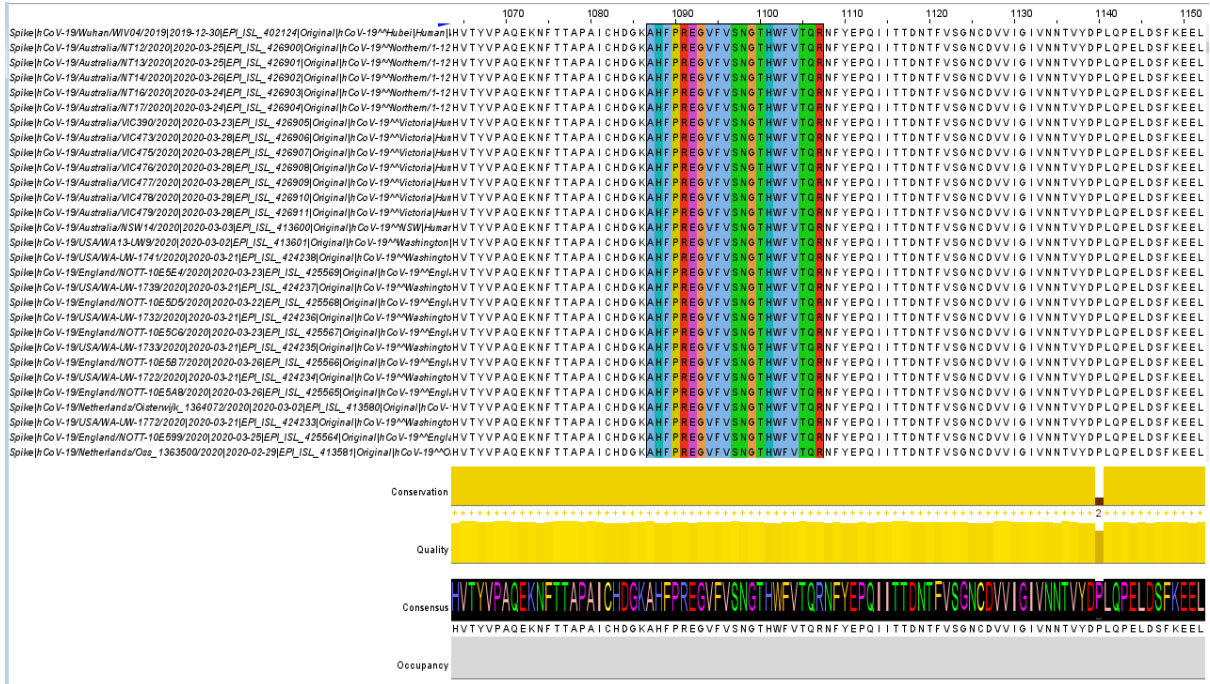

Supplementary figure 1: All 7 peptides aligned and visualised with respective proteins of different SARS-CoV-2 strains submitted in GISAID database. The visualisation is done using JalView tool where the coloured regions show the peptide invariability across the strains.
